# Supplementary material for: Extracellular Vesicles from Steatotic Hepatocytes Provoke Pro-Fibrotic Responses in Cultured Stellate Cells
Source: MDPI journal article supplement (doi:10.3390/biom12050698), 2022-05-13

Koenen et al., 2022 - Original western blot images

Figure 1E\*

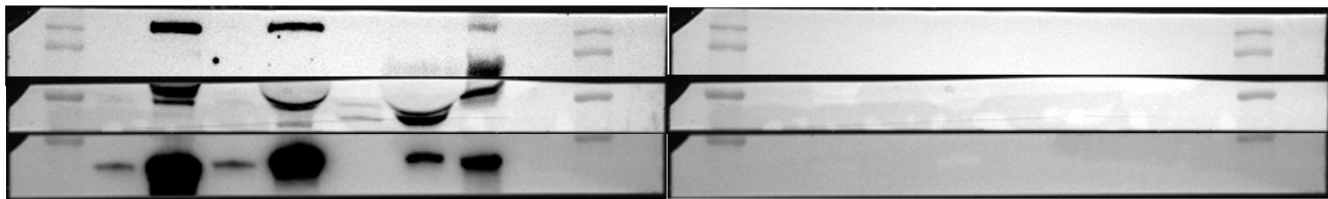

\* Membrane was physically cut and developed separately by experimenter (left: ECL, right: light)

Figure 4F: actin

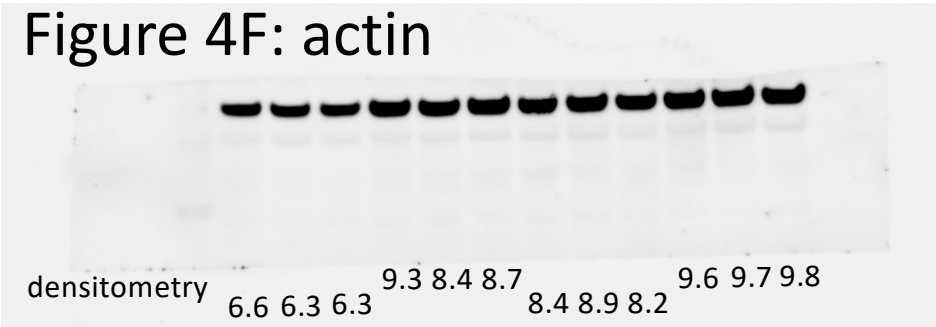

Figure 4F: GFAP

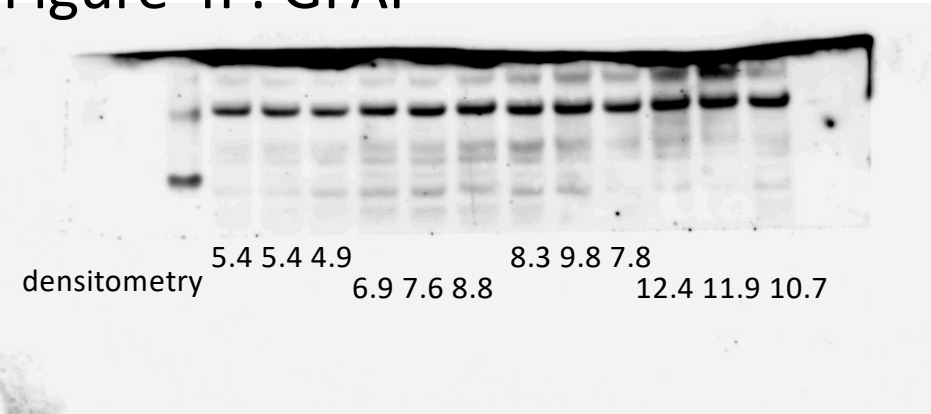

Figure 4G: vimentin and actin\*\*

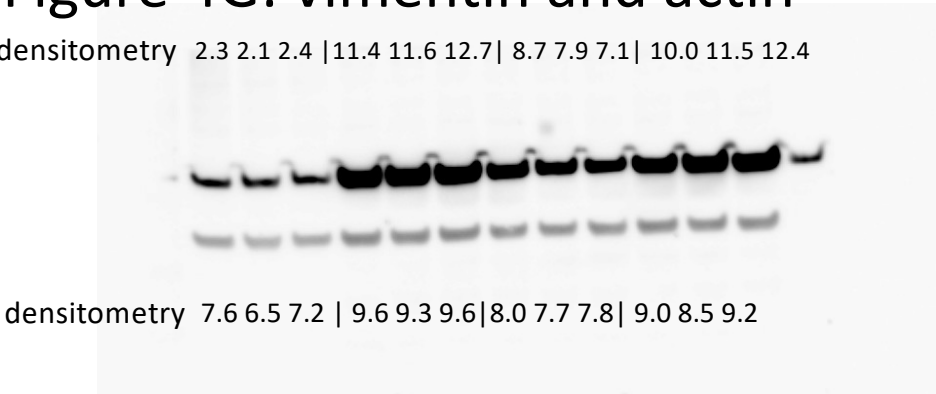

\*\* Membrane was developed with cocktail of anti-vimentin and anti-actin (top signal: vimentin, lower signal: actin)

Figure 1A: NTA analysis of C-EV

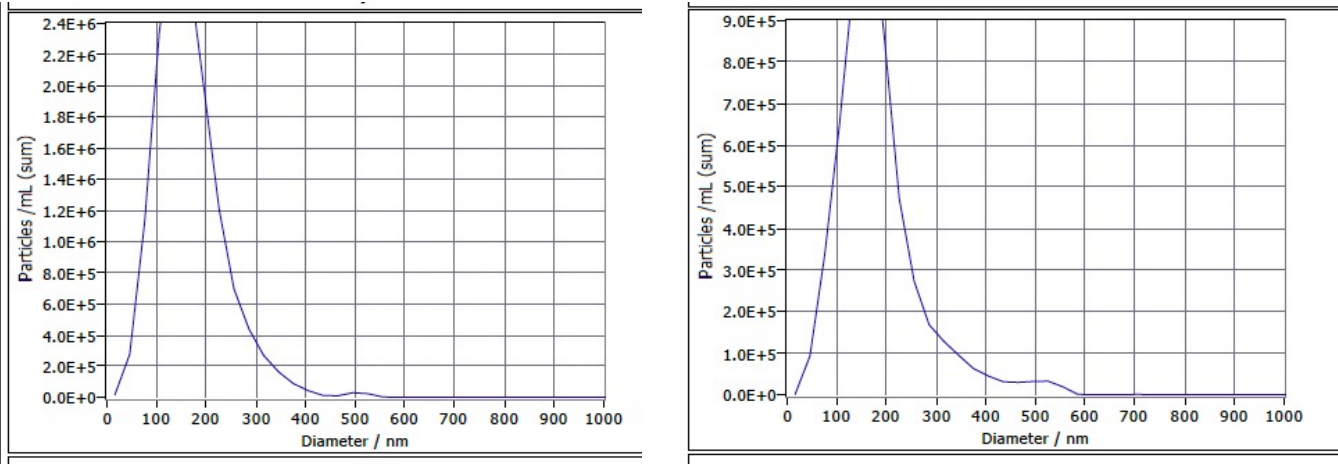

Figure 1A: NTA analysis of FA-EV

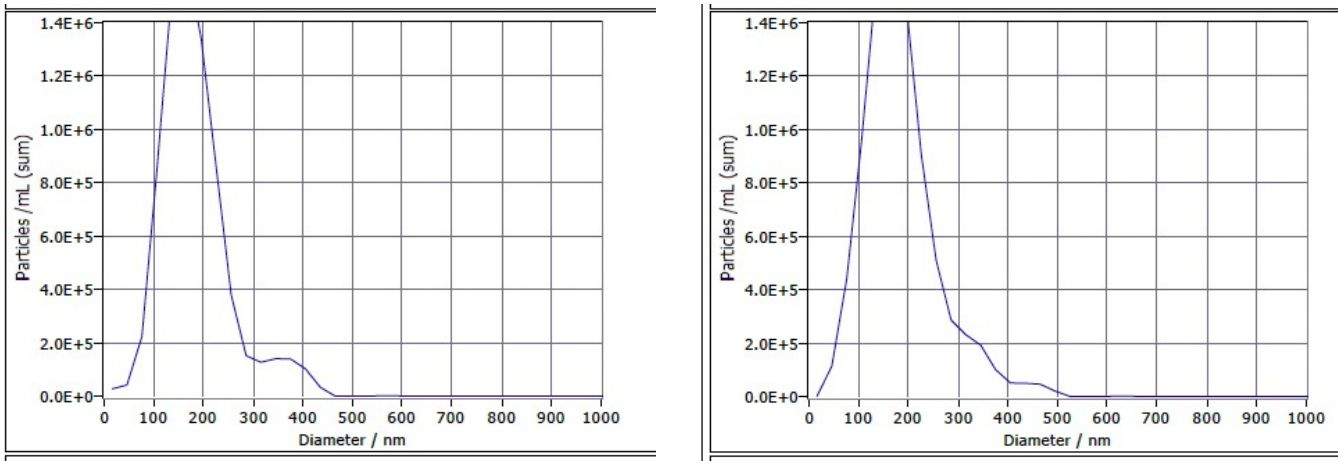

Figure 1B: Electron microscopy of C-EV

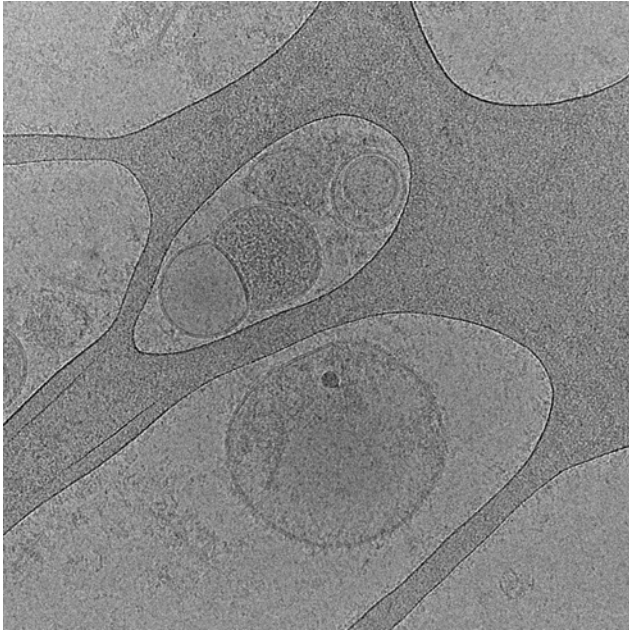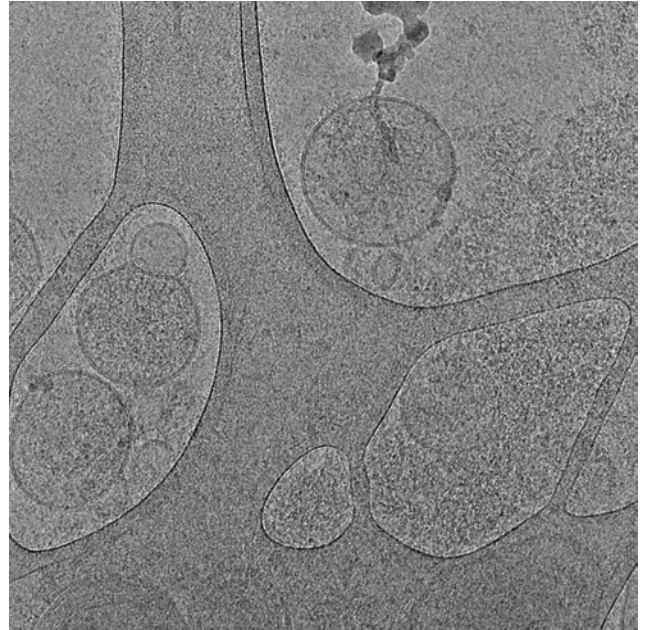

Figure 1B: Electron microscopy of FA-EV

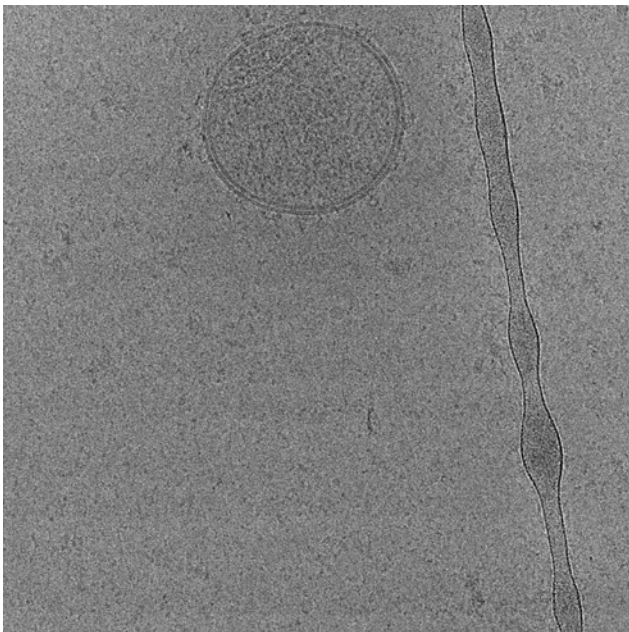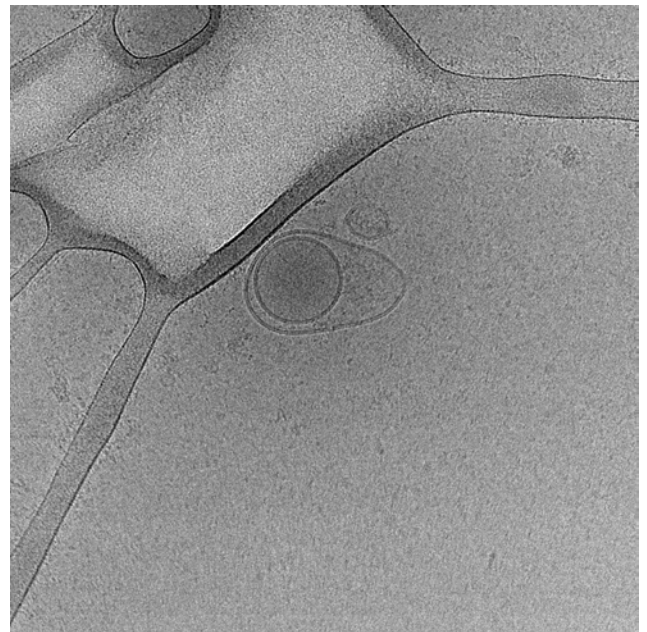

Figure 4A: actin-staining and DAPI

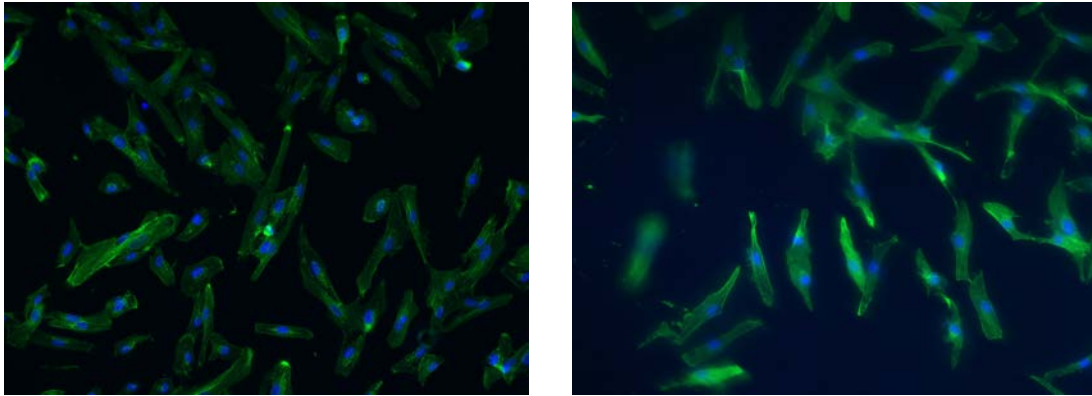

Figure 4B: actin-staining and DAPI

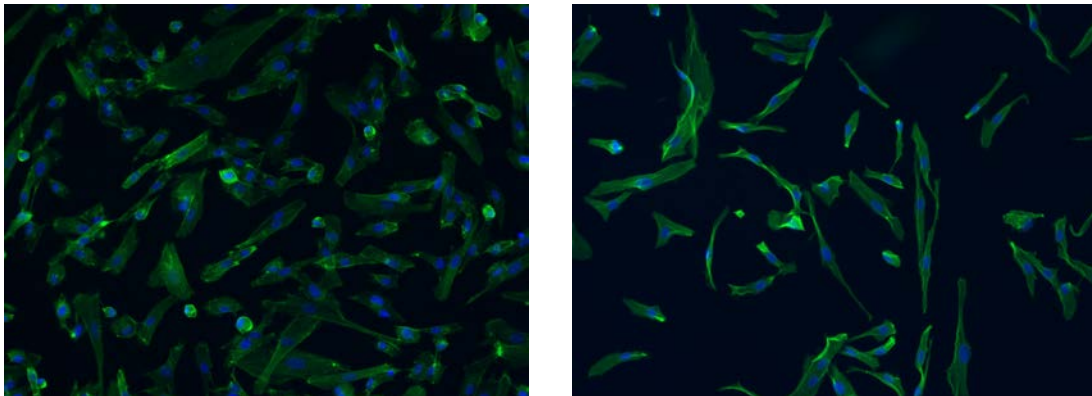

Figure 4C: actin-staining and DAPI

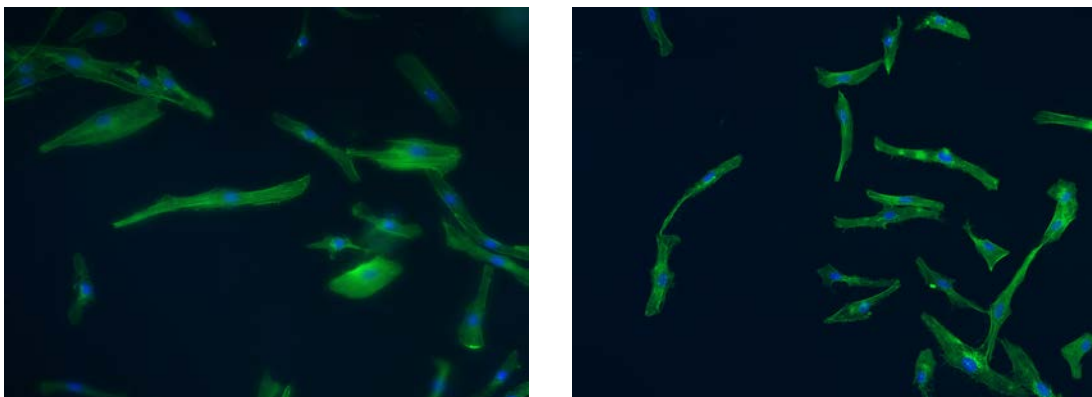



Figure 5A: Collagen, actin and DAPI

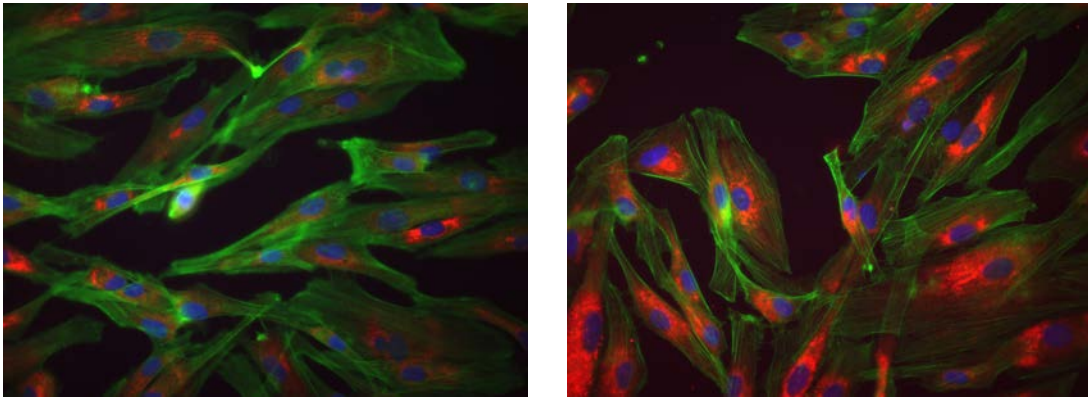

Figure 5B: Collagen, actin and DAPI

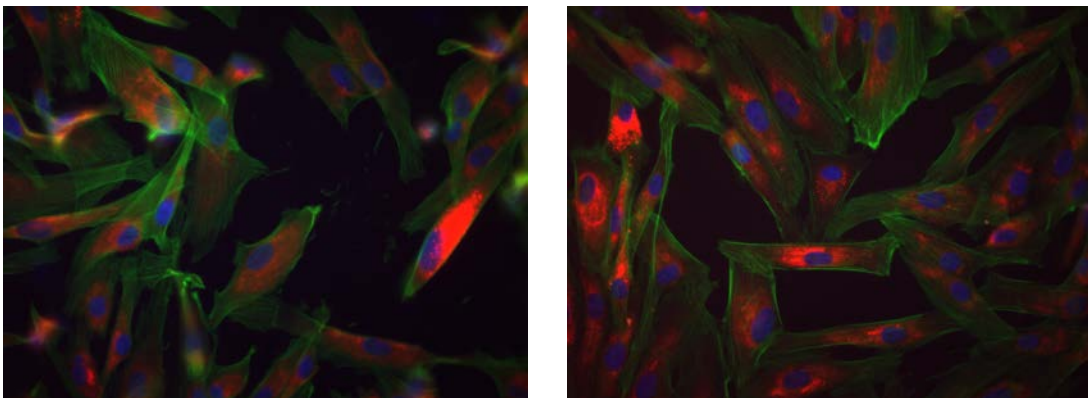

Figure 5C: Collagen, actin and DAPI

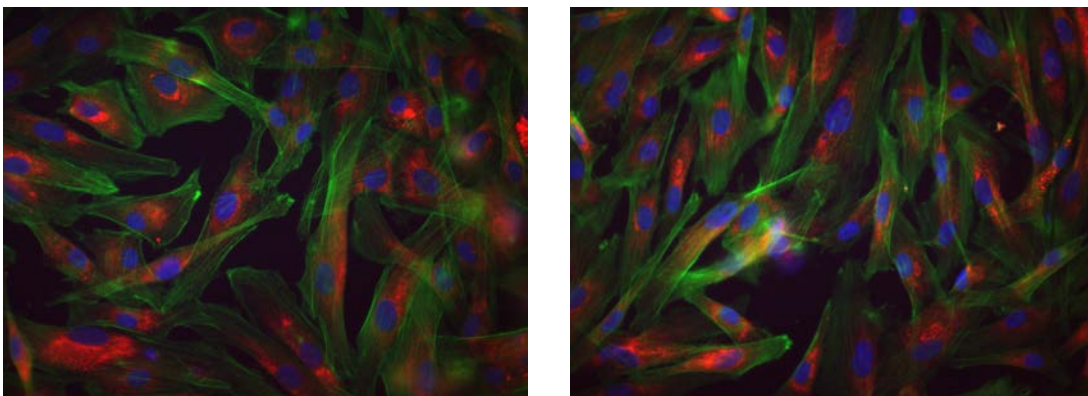

Figure A1: HepG2 Oil Red O

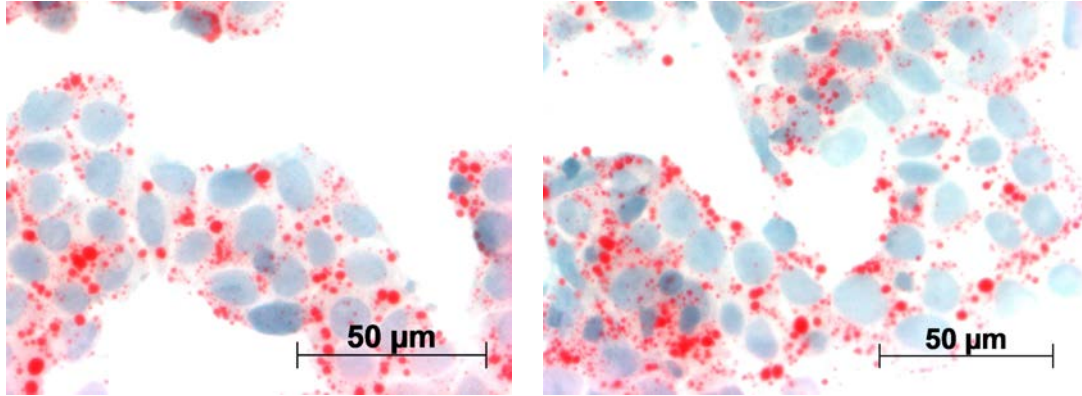

Figure A1: HepG2+FA Oil Red O

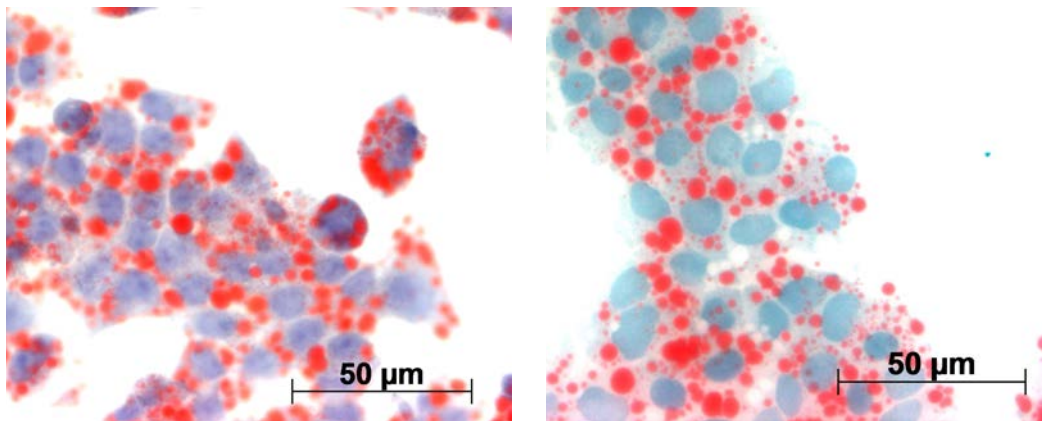

Supplement: s1 [file s1]
